# Supplementary material
Source: PubMed Central journal article supplement (PMC5127695)
Supplement: jci-126-88069-s001.pdf [file jci-126-88069-s001.pdf]

# SUPPLEMENTAL FIGURE 1

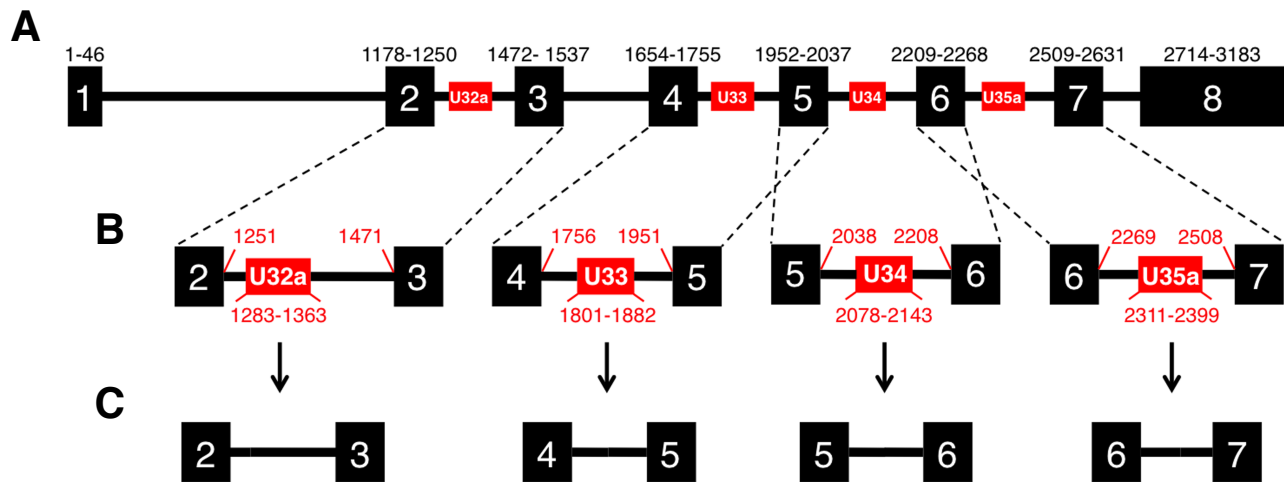

## Supplemental Figure 1. Approach for removal of snoRNAs from *Rpl13a* gene.

(A) Wild type *Rpl13a* exon-intron structure is shown, with exons in black and intronic snoRNAs in red rectangles. Numbering in black reflects the limits of the exonic sequences, relative to the translation start of the gene.

(B) Enlarged detail of snoRNA-containing introns is displayed. Numbering in red reflects the limits of the intronic sequences and the snoRNAs, relative to the translation start of the gene.

(C) Targeting construct was generated by removing nucleotides 1283-1363 encoding U32a, nucleotides 1801-1882 encoding U33, nucleotides 2078-2143 encoding U34, and nucleotides 2311-2399 encoding U35a.

# SUPPLEMENTAL FIGURE 2

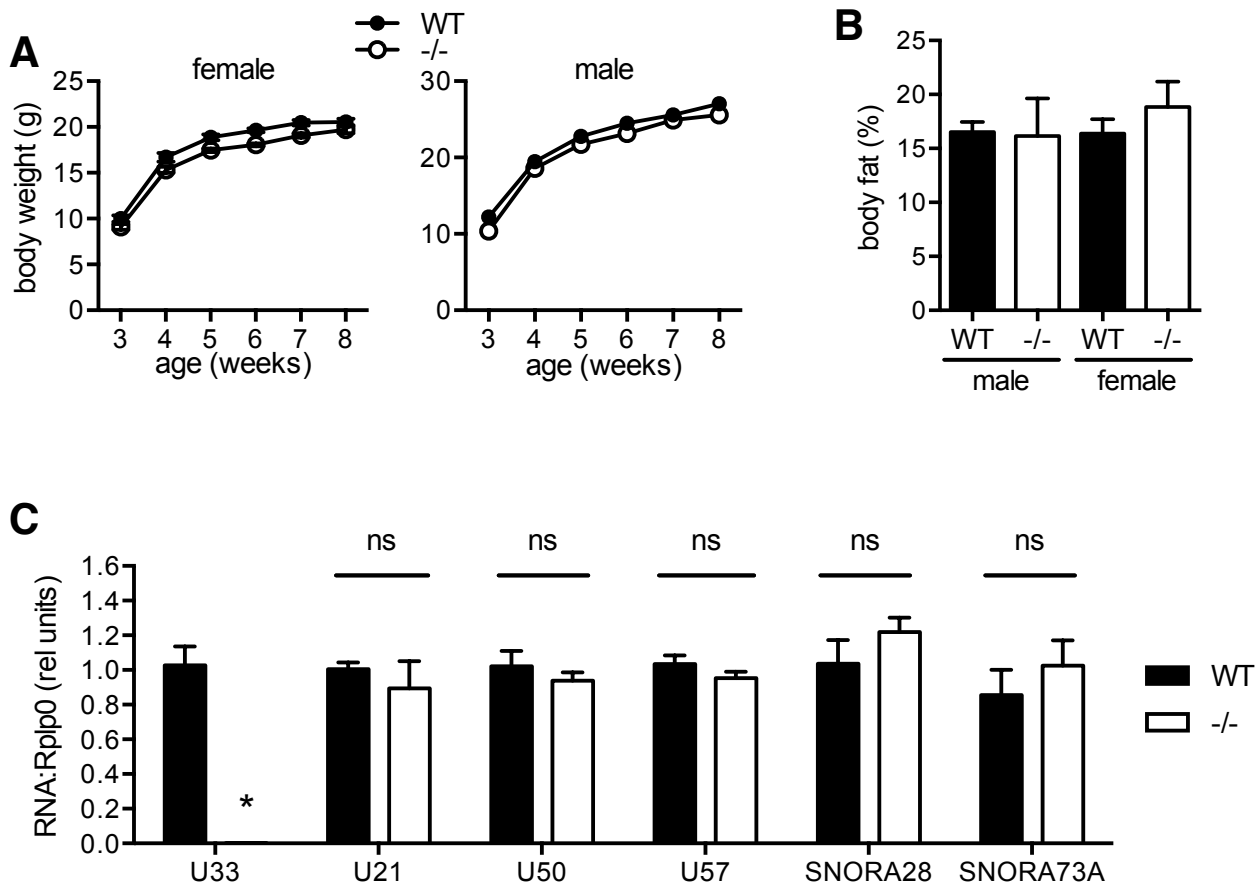

## Supplemental Figure 2. Body weight and composition of *Rpl13a*-snoless mice.

(A) Mean ( $\pm$ SE) serial weights for WT (filled circles) and -/- (open circles) mice.  $n = 10-12$  mice/genotype/sex.

(B) Mean percent body fat ( $\pm$ SE) for WT (filled bars) and -/- (open bars) mice at 7 to 8 weeks of age.  $n \geq 4$  mice/genotype/sex.

(C) qPCR quantified expression (relative to *Rplp0*) of *Rpl13a* snoRNA U33 and 5 unrelated snoRNAs in WT and -/- liver tissue. Mean + standard error (SE) for a minimum of  $n = 5$  mice/genotype.

\*;  $P < 0.001$  for -/- vs. WT; ns, non-significant determined by unpaired t-test

# SUPPLEMENTAL FIGURE 3

**A**

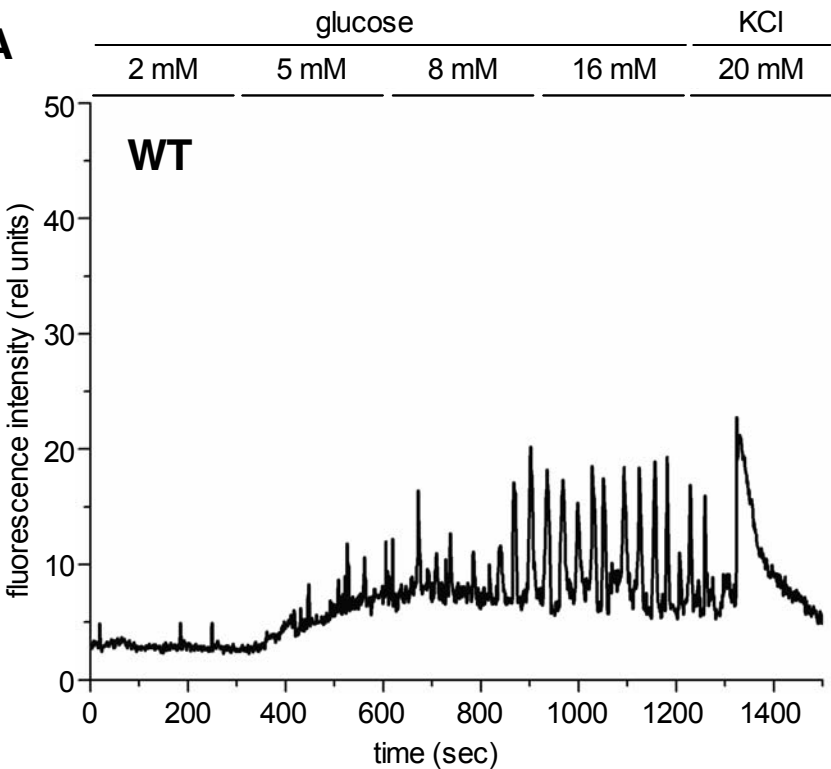

**B**

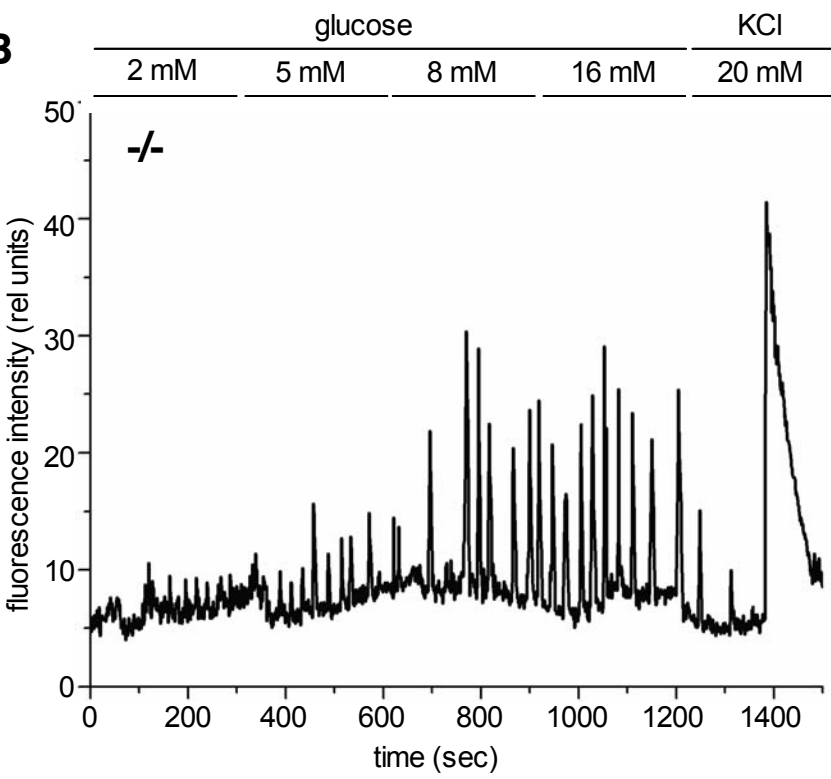

### **Supplemental Figure 3. Representative calcium oscillations.**

Traces of calcium oscillations at 2, 5, 8 and 16 mM glucose, or with addition of 20 mM KCl in representative single  $\beta$ -cell within whole islet from WT (**A**) and -/- (**B**) mouse. As expected, higher glucose concentrations trigger larger calcium oscillations in islets of both genotypes, and addition of KCl triggers fast and maximal influx of calcium into the cytoplasm, resulting in greater spike and consequent decay of fluorescence intensity. Note higher relative change in fluorescence intensity in -/- vs. WT.

# SUPPLEMENTAL FIGURE 4

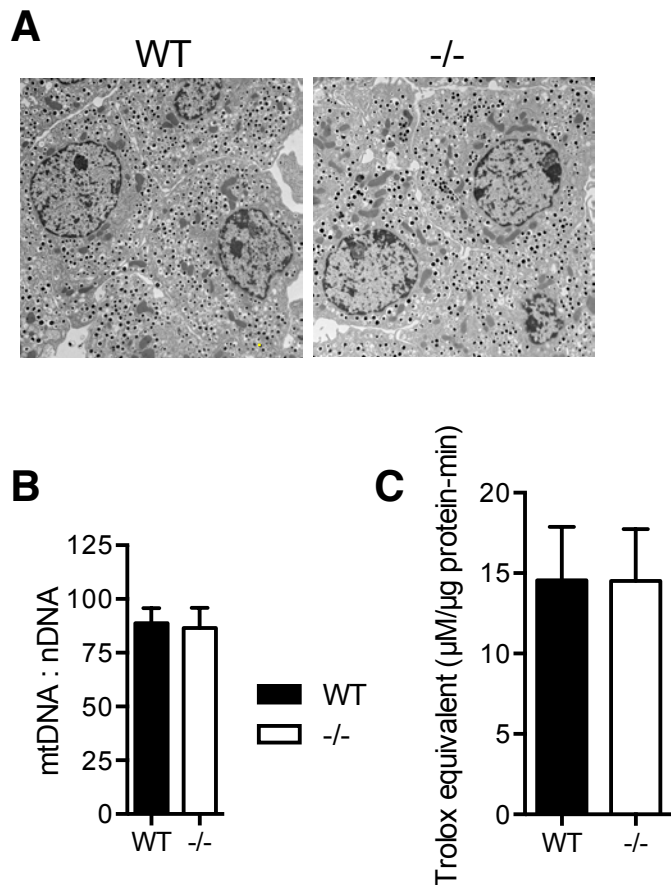

**Supplemental Figure 4. Mitochondrial morphology and anti-oxidant capacity are unchanged in *Rpl13a*-snoless islets.**

(A) Representative thin section electron micrographs of isolated WT and -/- islets. Scale bar, 2  $\mu\text{m}$ .

(B) Quantification of WT (filled bars) and -/- (open bars) islet mitochondrial DNA (mtDNA) relative to nuclear DNA (nDNA). Means (+SE) for n = 4 mice/genotype.

(C) Trolox equivalent anti-oxidant capacity of lysates from WT and -/- islets for n = 4 mice/genotype

# SUPPLEMENTAL FIGURE 5

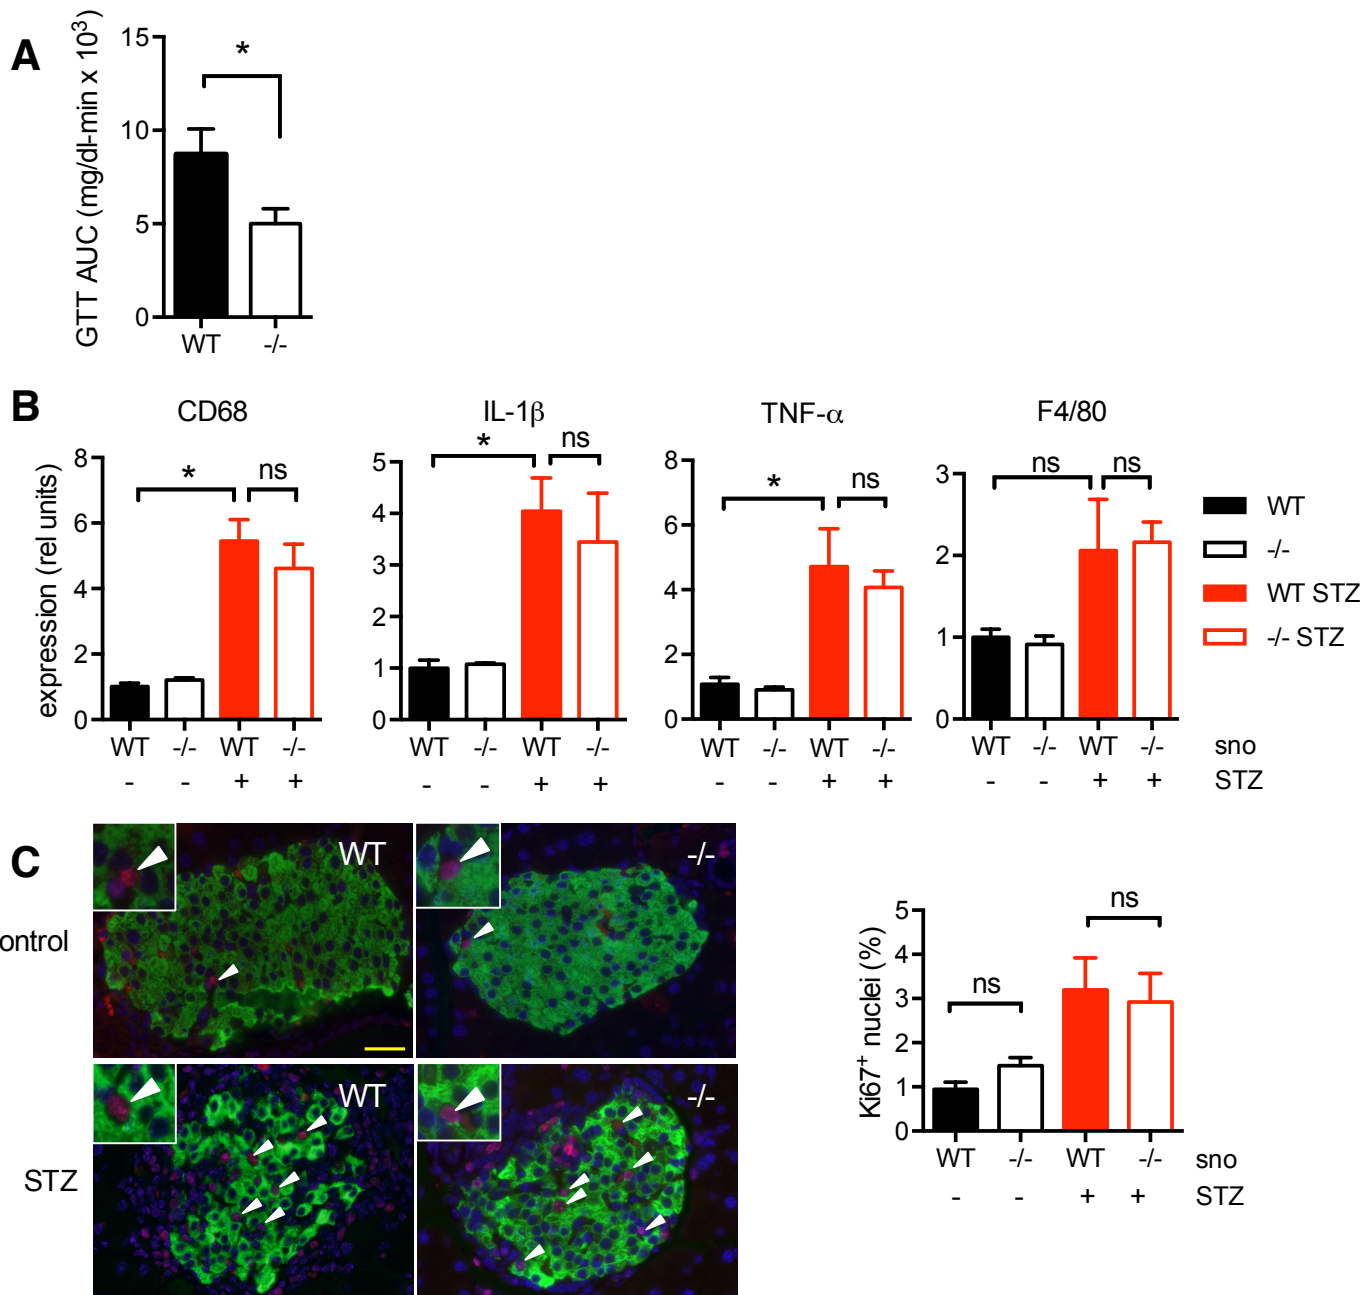

**Supplemental Figure 5. STZ-induced inflammation and  $\beta$ -cell replication is indistinguishable between WT and *Rpl13a*-snoless islets.**

(A) AUC during GTT in 16-week old WT and -/- mice. n = 9 mice/genotype.

(B) qPCR quantified expression of inflammatory markers (relative to *Rplp0*) in wild type (filled bars) and -/- (open bars) islets 5 days after PBS (black) or STZ (red) treatment. Means (+SE) for n = 3 mice per genotype/treatment.

(C) Representative pancreas sections stained for Ki-67 5 days after STZ. Scale bar, 25  $\mu$ m. Graph shows quantification of means (+SE) for n = 4 mice per genotype/treatment.

\*, p < 0.05 for comparisons indicated; ns, not significant determined by unpaired t-test

**Supplemental Table 1. Quality Control for RNAseq Samples**

| Sample          | Total reads | Total aligned | % Aligned | % Uniquely aligned | Average length | FRET<br>(average quality) | %GC    |
|-----------------|-------------|---------------|-----------|--------------------|----------------|---------------------------|--------|
| Rpl13a-snoless1 | 43,134,384  | 34,580,071    | 70.13%    | 60.16%             | 49.93          | 35.61                     | 51.87% |
| Rpl13a-snoless2 | 50,052,151  | 43,147,485    | 76.50%    | 66.87%             | 49.93          | 35.76                     | 49.47% |
| Rpl13a-snoless3 | 59,238,549  | 47,915,432    | 70.90%    | 61.02%             | 49.93          | 35.63                     | 50.78% |
| Rpl13a-snoless4 | 55,209,748  | 45,935,704    | 73.91%    | 64.69%             | 49.92          | 35.74                     | 49.86% |
| WT1             | 76,608,177  | 61,733,952    | 70.66%    | 60.85%             | 49.93          | 35.59                     | 51.63% |
| WT2             | 53,914,668  | 46,342,409    | 77.09%    | 68.30%             | 49.93          | 35.65                     | 51.27% |
| WT3             | 57,690,914  | 47,486,694    | 73.17%    | 64.12%             | 49.94          | 35.58                     | 52.32% |
| WT4             | 59,756,051  | 50,511,204    | 74.88%    | 65.33%             | 49.94          | 35.57                     | 52.15% |

**Supplemental Table 2. Differentially expressed genes between *Rpl13a*-snoless and WT islets**

| Gene ID  | Gene name                                    | Fold change<br>(-/- vs. WT) | P-value  | FDR step up | LSMean(-/-) | LSMean(WT) |
|----------|----------------------------------------------|-----------------------------|----------|-------------|-------------|------------|
| Arhgef26 | Rho guanine nucleotide exchange factor 26    | 3.15                        | 2.77E-05 | 4.27E-02    | 7.65        | 2.43       |
| Itih4    | Inter-alpha-trypsin inhibitor heavy chain H4 | 19.91                       | 9.02E-06 | 2.28E-02    | 16.59       | 0.83       |
| Mir6240  | MiR-6240                                     | 2.40                        | 1.45E-05 | 2.60E-02    | 62.74       | 26.13      |
| Rgs2     | Regulator of G-protein signaling 2           | 3.86                        | 4.70E-07 | 4.25E-03    | 61.90       | 16.02      |
| Slc14a2  | Urea transporter 2                           | -3.37                       | 9.73E-06 | 2.28E-02    | 2.41        | 8.10       |
| Upp2     | Uridine phosphorylase 2                      | 15.58                       | 7.88E-07 | 4.25E-03    | 8.61        | 0.55       |



### Supplemental Table 3. Primer Sequences; related to Experimental Procedures

#### PCR for Genotyping

forward (F)

reverse (R)

#### sequence 5' to 3'

GAC AGG TTG CTG CTC AGG AAG TAAATG G

CCA GAC CTG CTT TCA GAC TTT AGC CTG

#### qRT-PCR for mRNAs

*Rplp0* F

*Rplp0* R

*Rpl13a* F

*Rpl13a* R

*Ucp2* F

*Ucp2* R

ATC CCT GAC GCA CCG CCG TGA

TGC ATC TGC TTG GAG CCC ACG TT

TGA GGT CCG GTG GAAATA CC

GGC CTT TTC CTT GCG TTT CT

ACA AGA CCA TTG CAC GAG AG

GGT TGG CTT TCA GGA GAG TAT C

#### qRT-PCR for snoRNAs

universal stem loop reverse primer

U32a F

U32a SLRT

U33 F

U33 SLRT

U34 F

U34 SLRT

U35a F

U35a SLRT

U21 F

U21 SLRT

U50 F

U50 SLRT

U57 F

U57 SLRT

SNORA73A F

SNORA73A SLRT

SNORA28 F

SNORA28 SLRT

TCC CGA CCA CCA CAG CC

GAG TCC ATG ATC AGC AAC ACT CAC C

GCG TGG TCC CGA CCA CCA CAG CCG CCA CGA CCA CGC CGA GTC TC

AGC TTG TGA TGA GAC ATC TCC CAC T

GCG TGG TCC CGA CCA CCA CAG CCG CCA CGA CCA CGC ACA GCC TC

CGT CTG TGA TGT TCT GCT ATT ACC TAC ATT GTT

GCG TGG TCC CGA CCA CCA CAG CCG CCA CGA CCA CGC AGC GTC TC

CTC ACG ATG GTC TTC GGA TG

GCG TGG TCC CGA CCA CCA CAG CCG CCA CGA CCA CGC TCC TGG CA

GCC AAT GAT GAC ACC ACA CTA ACT GA

GCG TGG TCC CGA CCA CCA CAG CCG C

TCT ATG ATG ATC CTA TCC CGA AC

GCG TGG TCC CGA CCA CCA CAG CCG C

GAT GAA CGA ACT TGG CCT GAC CTT C

GCG TGG TCC CGA CCA CCA CAG CCG C

AAC GGG AGC TTA GGG CAT T

GCG TGG TCC CGA CCA CCA CAG CCG CCA CGA CCA CGC TTT TGT

CCG TCT GAC ACA ATT TGA GC

GCG TGG TCC CGA CCA CCA CAG CCG CCA CGA CCA CGC TTT GTT AG
